# Supplementary material
Source: MDPI journal article supplement (https://www.mdpi.com/2073-445X/11/8/1254)
Supplement: s1 [file s1]

**Table S1.** Coded Terms and associated words in the two original languages (Italian and Portuguese), aggregated into four categories, “biophysical elements” - I category, “general concepts” related to environment and ecological transition (hereafter “general concepts”) - II category, “threats and challenges” potentially addressed by NBS (hereafter “threats and challenges”) - III category, and “different ecosystem-based approaches” (hereafter “NBS”) - IV category. Hereafter displayed in Italian and Portuguese.

| Terms                                                             |                                                        |
|-------------------------------------------------------------------|--------------------------------------------------------|
| Italian                                                           | Portuguese                                             |
| .Alber*                                                           | Arvor*                                                 |
| Aria                                                              | Ar                                                     |
| Territor*                                                         | Territor*                                              |
| Acqua   Idric   Area Irrigua   Area umida                         | Água   area humida   irrigação                         |
| Suol*                                                             | Solo                                                   |
| Ecosist*                                                          | Ecosistema*                                            |
| Biodivers*   habitat   Specie                                     | Biodiversidade   habitat   especie                     |
| Riparie   Riparial*                                               | Rípicola                                               |
| Forest*                                                           | Florest*                                               |
| Agroeco*                                                          | Agroecologico                                          |
| Marin*/Costier*                                                   | Mar   Marinh   Costeir*                                |
| Cambiament* Climatic*                                             | Alterações clim*                                       |
| Capitale naturale                                                 | Capital Natural                                        |
| Economi* Circolar*                                                | Economia circular                                      |
| Green   verd*                                                     | Verde                                                  |
| Transizione climatica                                             | Transição climática                                    |
| Transizione Ecologica                                             | Transição ecológica                                    |
| Insosten*                                                         | Insustent*                                             |
| Resilien*                                                         | Resili*                                                |
| Sostenib*                                                         | Sustent*                                               |
| Resistenz*                                                        | Resist*                                                |
| Natur*                                                            | Natur*                                                 |
| Ecologi*                                                          | Ecológ*                                                |
| Consumo di suolo   Urbanizzazione                                 | Uso do solo                                            |
| Impermebil*                                                       | Imperme*                                               |
| Inquina*                                                          | Polu*                                                  |
| Frammentazione degli habitat/ecosistemi   Perdita di biodiversit* | Fragmentação* habitats   ecossistemas   biodiversidade |
| Rischio idrogeologico   Fran*   alluv*                            | Risco hidrológico   Risco Vertentes   Cheias           |
| Siccit*                                                           | Seca                                                   |

|                                            |                                                                                     |                                                                                                     |
|--------------------------------------------|-------------------------------------------------------------------------------------|-----------------------------------------------------------------------------------------------------|
|                                            | Ondat* di calore   isol* di calore   stress term*                                   | Onda/s de Calor   Stress térmico   ilha de calor                                                    |
|                                            | Desertificazione*                                                                   | Desertifi*                                                                                          |
|                                            | Efficienza energetica                                                               | Eficiencia energetica                                                                               |
| IV Category -<br>Nature-based<br>solutions | Ret* Ecologic*   Connessione* Ecologic*                                             | Rede   Conexão Ecológica/s                                                                          |
|                                            | Parc* natural*   Are* protett*   are* natural*   are* marin*                        | Parque natural/ais   Parque nacional/ais   Area Protegida/s   Espaço/area natural/ais/ Area marinha |
|                                            | Conservazione della natura/paesaggio/biodiversità/habitat                           | Conservação da natureza/habitats/ecossistemas/biodiversidade/paisagem                               |
|                                            | Restoration Ecology   Ripristino della natura   Ripristino eco*/Ambient*   Bonific* | Restauração   recuperação ecológica   natureza   ambiente                                           |
|                                            | Approcci* Ecosistemic*                                                              | Abordagem ecossistêmica                                                                             |
|                                            | Servizi* ecosistemic*                                                               | Serviços dos ecossistemas                                                                           |
|                                            | Rinatur*   Rinverd*                                                                 | Renaturaliza*                                                                                       |
|                                            | Basate sulla natura                                                                 | Baseadas na natureza                                                                                |
|                                            | Infrastruttura blu                                                                  | Infraestrutura azul                                                                                 |
|                                            | Infrastruttura Verd*   Corridoi* Ecologic*                                          | Corredor Verde   Infraestrutura verde   Corredor Ecologico                                          |
|                                            | Ingegneria naturalistica                                                            | Soluções de engenharia natural/Soluções de arquitectura bioclimática                                |
|                                            | Permeabil*                                                                          | Permeabi*                                                                                           |
|                                            | Forest* Urban*                                                                      | Floresta Urbana                                                                                     |
|                                            | Piantum*   Riforestaz*   Afforest*                                                  | Florestação   Reflorestação                                                                         |
|                                            | Giardin*   Are* verd*   Verde urbano   Spazi* verd*                                 | Area verde/s   Jardim/s   Espaço verde/s   Mancha verde/s                                           |
